# Supplementary material for: Scrub typhus point-of-care testing: A systematic review and meta-analysis
Source: PLoS Negl Trop Dis. 2018 Mar 26;12(3):e0006330. doi: 10.1371/journal.pntd.0006330 (PMC5892940; doi:10.1371/journal.pntd.0006330)
Supplement: S2 Dataset — (XLSX) [file pntd.0006330.s002.xlsx]

## Sheet: wo desc
no	id	author	year_pub	Was a consecutive or random sample of patients enrolled?	Was a case-control design avoided?	Did the study avoid inappropriate exclusions?	Could the selection of patients have introduced bias?	Are there concerns that the included patients do not match the review question?	Were the index test results interpreted without knowledge of the results of the reference standard?	If a threshold was used, was it pre-specified?	Could the conduct or interpretation of the index test have introduced bias?	Are there concerns that the index test, its conduct, or interpretation differ from the review question?	Is the reference standard likely to correctly classify the target condition?	Were the reference standard results interpreted without knowledge of the results of the index test?	Could the reference standard, its conduct, or its interpretation have introduced bias?	Are there concerns that the target condition as defined by the reference standard does not match the review question?	Was there an appropriate interval between index test(s) and reference standard?	Did all patients receive a reference standard?	Did all patients receive the same reference standard?	Were all patients included in the analysis?	Could the patient flow have introduced bias?
1	1	Blacksell SD et al	2010	Yes	Yes	No	Low	Low	Yes	N/A	Low	Low	Yes	Unclear	Unclear	Low	Yes	Yes	Yes	Yes	Low
2	2	Blacksell SD et al	2010	No	No	Yes	High	Low	Unclear	N/A	Low	Low	Yes	Unclear	Unclear	Low	Yes	Yes	Yes	Yes	Low
3	3	Blacksell SD et al	2012	Yes	Yes	Yes	Low	Low	Unclear	Yes	Unclear	Low	Yes	Unclear	Low	Low	Yes	No	Yes	Yes	Low
4	4	Cao et al	2007	No	No	No	High	High	Unclear	Yes	Unclear	Low	Unclear	Unclear	Unclear	Unclear	Yes	Yes	Unclear	Yes	Low
5	6	Ching et al	2001	No	No	No	High	Low	Unclear	N/A	Unclear	Low	Yes	Unclear	Unclear	High	Yes	Yes	Yes	No	Low
6	7	Chinprasatsak	2001	Yes	Yes	Yes	Low	Low	No	Yes	Low	Low	Yes	Unclear	Unclear	Low	Yes	Yes	No	Yes	Low
7	8	Coleman et al	2002	Yes	Yes	Yes	Low	Low	Yes	Yes	Low	Low	Yes	Yes	Low	Low	Yes	Yes	Yes	Yes	Low
8	9	Kim et al	2016	No	No	Yes	High	High	Unclear	N/A	Unclear	Low	Yes	Unclear	Unclear	Low	Yes	Yes	Yes	Yes	Low
9	10	Kingston et al	2015	No	No	Yes	High	Low	Yes	N/A	Low	Low	Yes	Yes	Low	Low	Yes	Yes	Yes	Yes	Low
10	11	Lee et al	2014	No	No	Yes	High	Low	Unclear	N/A	Unclear	Low	Yes	Unclear	Unclear	Low	No	Yes	Yes	Yes	Low
11	13	Paris et al	2008	No	No	Yes	High	Low	Yes	N/A	Low	Low	Yes	Yes	Low	Low	Yes	Yes	No	Yes	Low
12	14	Ramyasree et al	2015	Yes	Yes	Yes	Low	Low	Unclear	N/A	Unclear	Low	Yes	Unclear	Unclear	Low	Yes	Yes	Yes	Yes	Low
13	15	Rodkvamtook et al	2015	Yes	Yes	Yes	Low	Low	Unclear	N/A	Unclear	Low	Yes	Unclear	Unclear	Low	Yes	Yes	Yes	Yes	Low
14	16	Silpasakorn et al	2012	No	No	Yes	High	Low	Unclear	N/A	Unclear	Low	Yes	Unclear	Unclear	Low	Yes	Yes	Yes	Yes	Low
15	17	Silpasakorn et al	2012	No	No	Yes	High	Low	Unclear	N/A	Unclear	Low	Yes	Unclear	Unclear	Low	Yes	Yes	No	Yes	High
16	18	Stephen et al	2015	Yes	Yes	Yes	Low	Low	Unclear	N/A	Unclear	Low	Yes	Unclear	Unclear	Low	Yes	Yes	Yes	Yes	Low
17	19	Stephen et al	2016	Yes	No	Yes	High	Low	Yes	N/A	Low	Low	Yes	Yes	Low	Low	Yes	No	Yes	Unclear	High
18	20	Watt et al	1998	Yes	Yes	Yes	Low	Low	Unclear	Yes	Unclear	Low	Yes	Unclear	Unclear	Low	Yes	Yes	Yes	Yes	Low
19	21	Watthanaworawit et al	2015	No	No	Yes	Low	Low	Unclear	N/A	Unclear	Low	Yes	Unclear	Unclear	Low	Yes	Yes	Yes	Yes	Low
20	22	Wilkinson et al	2003	No	No	Yes	High	Unclear	Unclear	N/A	Unclear	Low	Unclear	Unclear	Unclear	Unclear	Yes	Yes	Yes	Yes	Low
21	23	Wongchotigul et al	2005	No	No	Yes	High	Low	Unclear	N/A	Unclear	Low	Yes	Unclear	Unclear	Low	Yes	Yes	Yes	Yes	Low
22	24	Zhang et al	2011	No	No	Yes	High	Low	Unclear	N/A	Unclear	Low	Yes	Unclear	Unclear	Low	Yes	Yes	Yes	Unclear	Low
23	25	Huber et al	2012	No	No	Yes	High	Unclear	Unclear	N/A	Unclear	Low	No	Unclear	High	Low	Yes	Yes	Yes	Yes	Low
24	26	Kim et al	2013	No	No	Yes	High	Low	Unclear	N/A	Unclear	Low	Unclear	Unclear	Unclear	Unclear	Yes	Unclear	Unclear	Yes	Unclear
25	27	Paris et al	2011	Yes	Yes	Yes	Low	Low	Yes	N/A	Low	Low	Yes	Yes	Low	Low	Yes	Yes	Yes	Yes	Low
26	28	Pradutkanchana et al	1997	No	No	Yes	High	Low	Unclear	Yes	Unclear	Low	Yes	Unclear	Unclear	Low	Yes	Yes	Yes	Yes	Low
27	29	Prakash et al	2006	Yes	Yes	Yes	Low	Low	No	Yes	High	Low	No	No	High	High	Yes	Yes	Unclear	Yes	High
28	30	Weddle et al	1995	No	No	Yes	High	Low	Unclear	N/A	Unclear	Low	Yes	Unclear	Unclear	Low	Yes	Yes	Yes	Yes	Low
29	31	Anitharaj et al	2016	Yes	Yes	Yes	Low	Low	Unclear	N/A	Unclear	Low	Yes	Unclear	Unclear	Low	Yes	Yes	Yes	Yes	Low
30	32	Kim et al	1993	No	No	Yes	High	Unclear	Unclear	N/A	Unclear	Low	Yes	Unclear	Unclear	Low	Yes	Yes	Yes	Yes	Low
31	33	Koay et al	1995	No	No	Yes	High	Unclear	Unclear	N/A	Unclear	Low	Yes	Unclear	Unclear	Low	Yes	Yes	Yes	Yes	Low
